# Supplementary material for: VBP1 modulates Wnt/β-catenin signaling by mediating the stability of the transcription factors TCF/LEFs
Source: PubMed Central journal article supplement (PMC7864075; doi:10.1074/jbc.ra120.015282), 2021-01-13

## Sup Figure legends

**Fig. S1 Amino acid sequence alignment of VBP1/Vbp1 and the spatiotemporal expression pattern of zebrafish *vbp1*.** (A) Amino acid sequence alignment of human, mouse, *Xenopus*, and zebrafish VBP1/Vbp1. Conserved amino acids are indicated in black shadow. The accession numbers are as follows: human VBP1 NP\_003363.1, mouse VBP1 NP\_035822.2, *Xenopus* Vbp1 NP\_001080849, and zebrafish Vbp1 NP\_001018460.1. (B) RT-PCR analysis of *vbp1* mRNA in zebrafish embryos at indicated stages. (C) Whole-mount *in situ* hybridization analysis of *vbp1* transcripts at indicated stages. Scale bar, 200  $\mu$ m. (D) Effectiveness of the used MO. One-cell stage embryos were injected with the *vbp1*-5'-UTR reporter plasmid DNA (50 pg) and control MO (cMO, 6 ng) or *vbp1*-targeting MO (MO1 and MO2, 4 ng and 6 ng). Fluorescence micrographs of injected embryos at 12 hpf are shown. Scale bar, 500  $\mu$ m.

Fig.S1

A

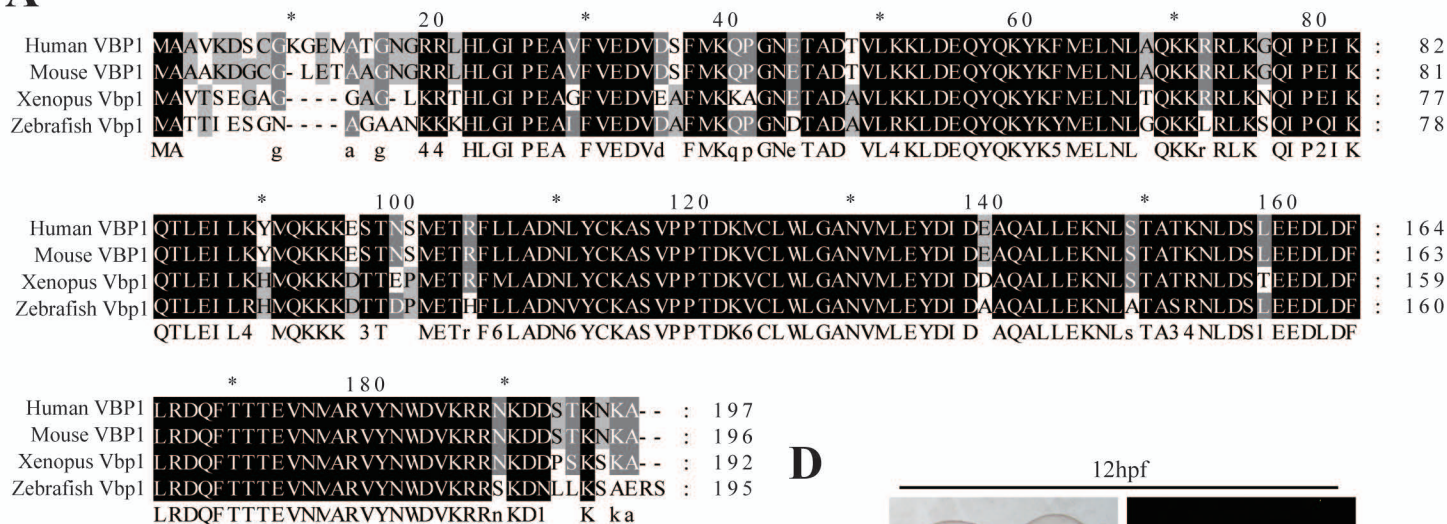

B

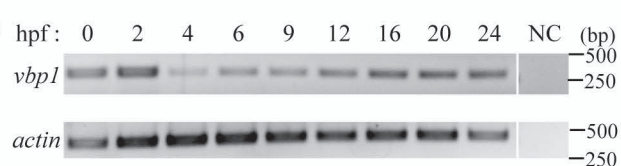

C

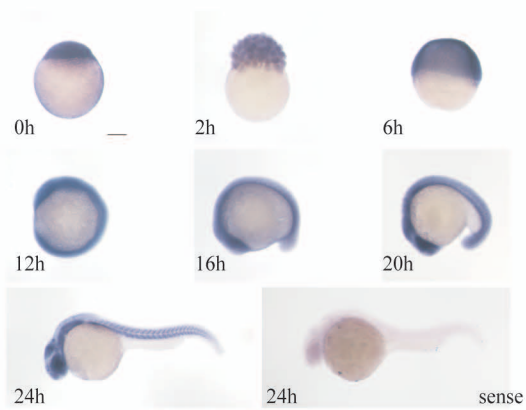

D

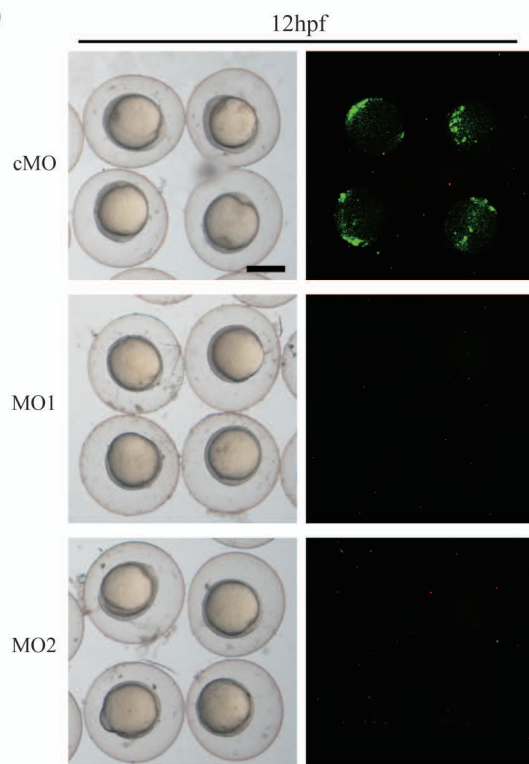

Supplement: mmc1.pdf [file mmc1.pdf]
